# Supplementary material for: Molecular weight distribution of raw and catalytic fast pyrolysis oils: comparison of analytical methodologies
Source: Royal Society of Chemistry journal article supplement (doi:10.1039/c9ra09726k), 2020-01-01
Supplement: c9ra09726k1.pdf [file c9ra09726k1.pdf]

Supplementary Material for Molecular Weight Distribution of Raw and Catalytic Fast Pyrolysis

Oils: Comparison of Analytical Methodologies

Harman-Ware et al.

Supplementary Table 1. GC/MS calibration standards and concentration ranges

| Compound                     | Concentration<br>(mg/mL) |
|------------------------------|--------------------------|
| Acetaldehyde                 | 0.05 - 1.0               |
| Benzene                      | 0.05 - 1.0               |
| n-octane                     | 0.10 - 2.0               |
| 1-octene                     | 0.05 - 1.0               |
| cis-1,4-dimethyl-cyclohexane | 0.10 - 2.0               |
| Toluene                      | 0.05 - 1.0               |
| p-Xylene                     | 0.10 - 2.0               |
| n-decane                     | 0.10 - 2.0               |
| 2-Cyclopentenone             | 0.05 - 1.0               |
| Benzene, propyl-             | 0.05 - 1.0               |
| Phenol                       | 0.05 - 1.0               |
| 2,3- Benzofuran              | 0.05 - 1.0               |
| Indene                       | 0.05 - 1.0               |
| o-Cresol                     | 0.05 - 1.0               |
| o-Methoxyphenol              | 0.05 - 1.0               |
| Tetralin                     | 0.10 - 2.0               |
| Naphthalene                  | 0.05 - 1.0               |
| Phenanthrene                 | 0.05 - 1.0               |

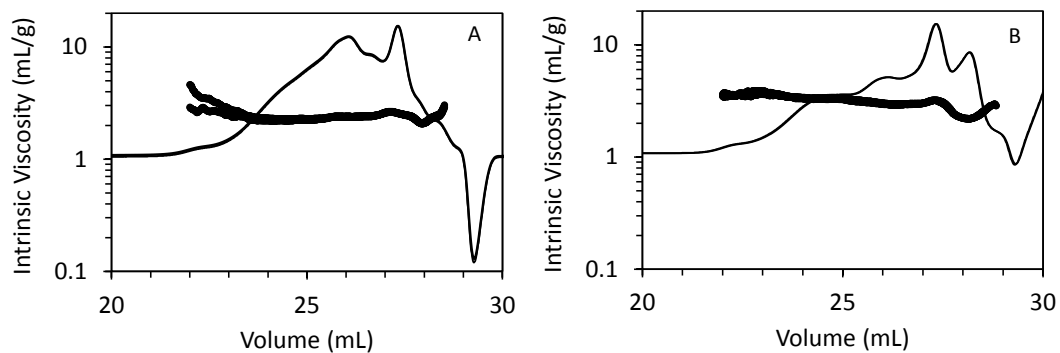

Supplemental Figure 1. Intrinsic viscosity,  $[\eta]$ , as a function of elution volume for FP and CFP oils with reference to differential RI-derived chromatograms.

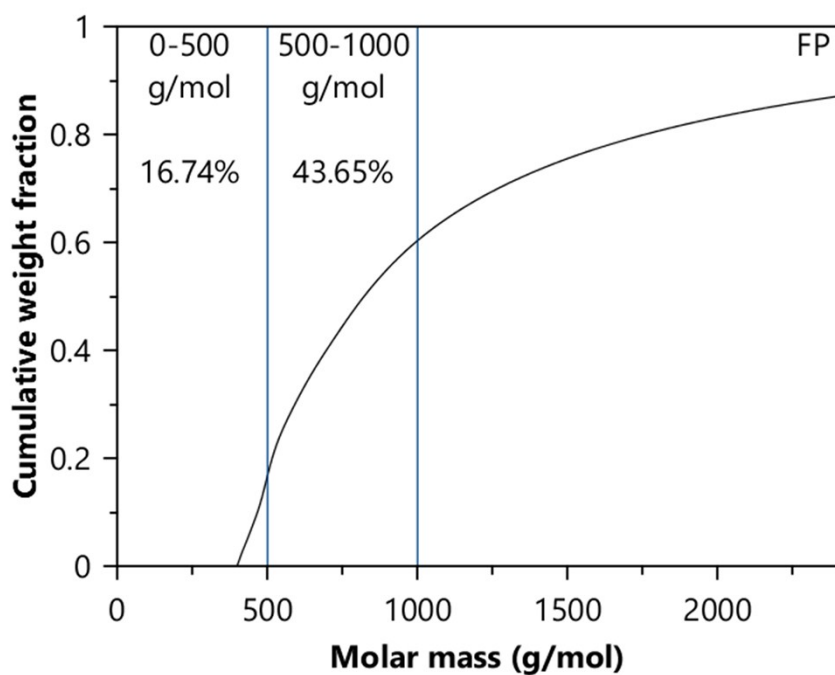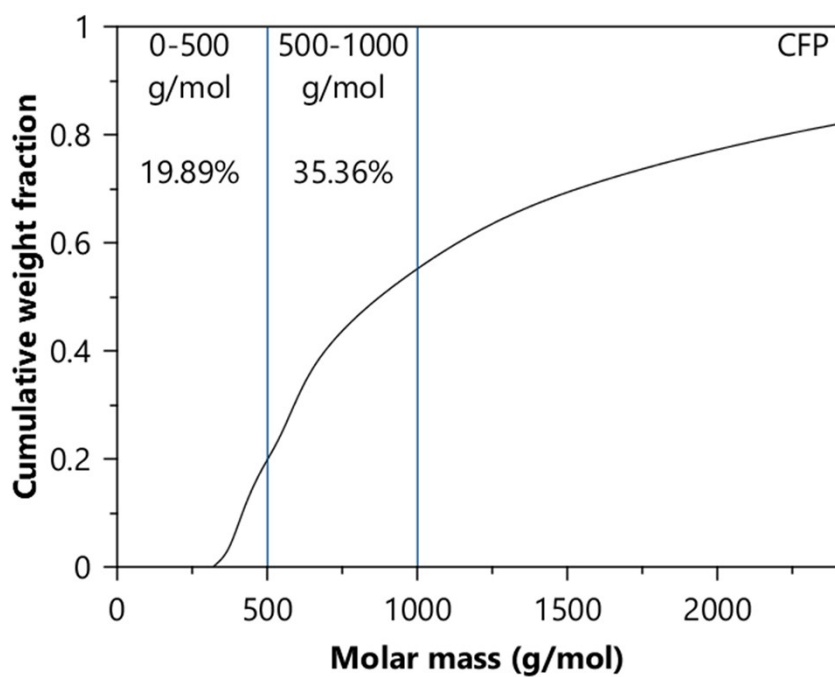

Supplemental Figure 2. Weight-fraction distributions measured by GPC show a lower distribution of analytes >500 g/mol in CFP oil (B) relative to FP oil (A). Analytes in permeation

volume not accounted for, hence the fraction of low mass species is underestimated, particularly for CFP oil.
